# Supplementary material
Source: publisher figshare collection journal article supplement (https://sage.figshare.com/ndownloader/files/13612331)
Supplement: Supplementary file 1 [file 13612331]

## Exercise 2. Strength or Extent of Leader Identity

The following two exercises will give you a sense of how much you see yourself as a leader. Complete both Part A and Part B with your instructor's guidance.

### Part A: Leader Meter

Color or shade in the "leader meter" to represent how much you see yourself as a leader.

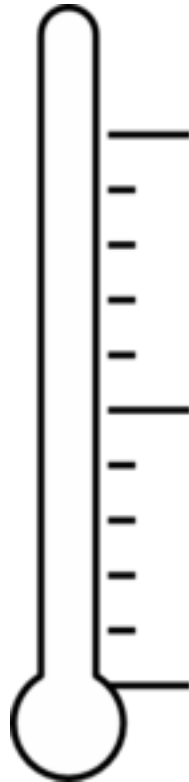

**Question Prompt:** What behaviors help you fill in the meter? How is your sense of “being” a leader connected to “doing” leadership, i.e., engaging in leadership activities? What claiming behaviors do you use? What granting behaviors do your followers use? What about the area not filled in? What behaviors can help you strengthen your leader identity?

## Part B: Identity Circles

**Instructions:** Imagine that one of the circles at the left in each row represents a leader identity and the circle on the right represents your own self-definition or identity. Circle ONE letter (A, B, C, D, or E) which best describes the level of overlap between your own identity and a leader identity.

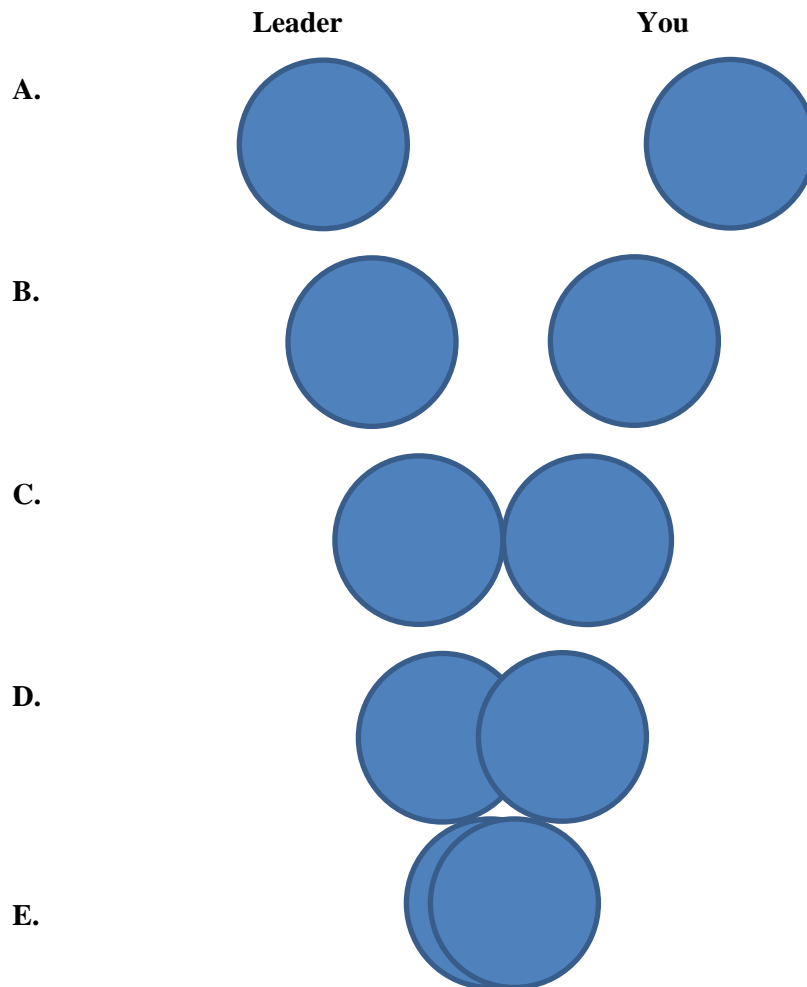

**Question Prompt:** How do your estimations of your leader identity strength match up with your meaning of leadership?
